# Supplementary material for: Vegetable Nitrate Intakes Are Associated with Reduced Self-Reported Cardiovascular-Related Complications within a Representative Sample of Middle-Aged Australian Women, Prospectively Followed up for 15 Years
Source: MDPI journal article supplement (doi:10.3390/nu11020240), 2019-01-22
Supplement: s1 [file s1]

## Supplementary Materials

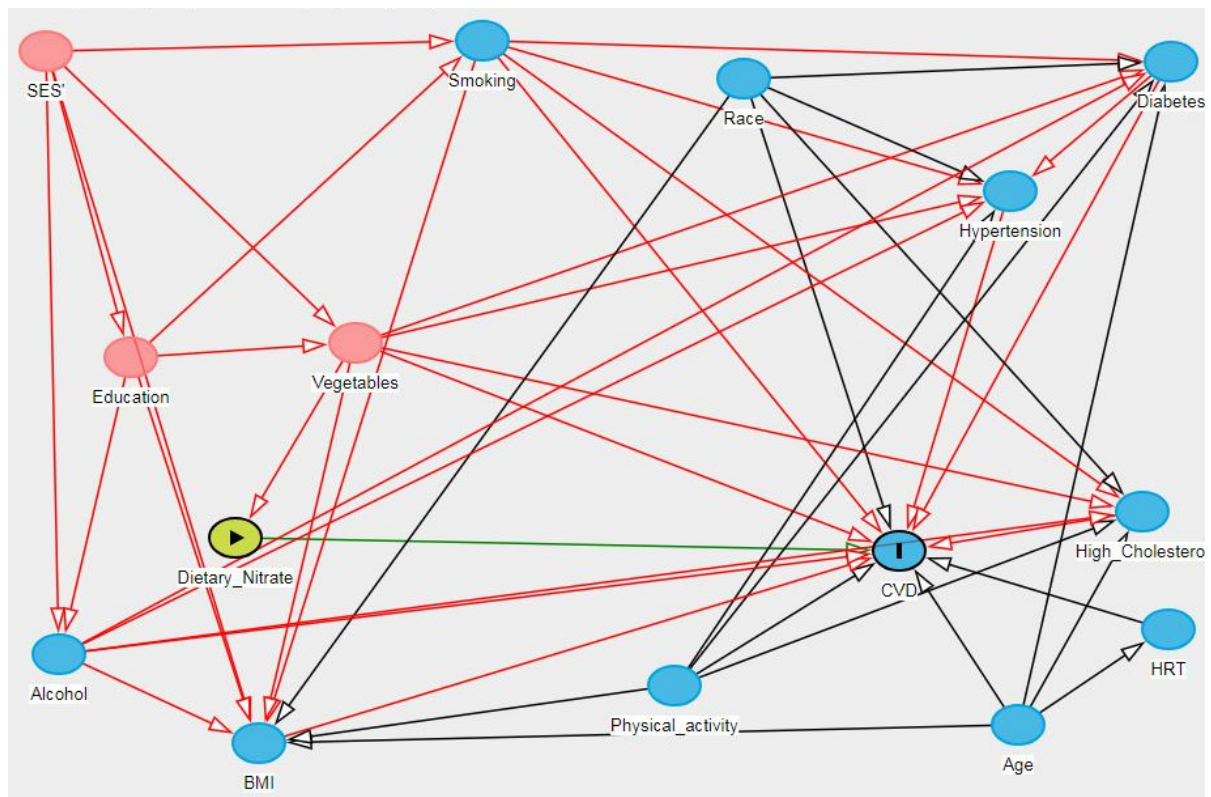

**Figure S1.** Directed Acyclic Graph (DAG). Used to identify confounders between dietary nitrate and self-reported cardiovascular diseases.
